# Supplementary material for: Predicting malignancy: subsolid nodules detected on LDCT in a surgical cohort of East Asian patients
Source: PubMed Central journal article supplement — J Thorac Dis. 2020 Aug;12(8):4315–26. doi: 10.21037/jtd-20-659 (PMC7475597; doi:10.21037/jtd-20-659), 2020-08
Supplement: jtd-12-08-4315-dss.pdf [file jtd-12-08-4315-dss.pdf]

## Data Sharing Statement

|                     |                                                                                                                                                    |                                                                                                                                                                                                                                                                                      |
|---------------------|----------------------------------------------------------------------------------------------------------------------------------------------------|--------------------------------------------------------------------------------------------------------------------------------------------------------------------------------------------------------------------------------------------------------------------------------------|
| <b>Article Info</b> | <a href="http://dx.doi.org/10.21037/jtd-20-659">http://dx.doi.org/10.21037/jtd-20-659</a> .                                                        |                                                                                                                                                                                                                                                                                      |
| <b>Item</b>         | <b>Question</b>                                                                                                                                    | <b>Authors' Response<br/>(place "-" if not applicable)</b>                                                                                                                                                                                                                           |
| 1                   | Would you like to share data collected for your study to others?                                                                                   | No thank you.                                                                                                                                                                                                                                                                        |
| 2                   | If not, would you like to share the reason for your decision?                                                                                      | Statistical data are already provided in the manuscript. Raw imaging data contain protected health information and are thus unsuitable for sharing. Moreover, the current dataset is being used in our other ongoing projects, and sharing might result in prior publication issues. |
| 3                   | What data in particular will be shared?                                                                                                            | -                                                                                                                                                                                                                                                                                    |
| 4                   | Any other documents will be share? Such as study protocol, statistical analysis plan, informed consent form, clinical study report, analytic code. | -                                                                                                                                                                                                                                                                                    |
| 5                   | When will data availability begin?                                                                                                                 | -                                                                                                                                                                                                                                                                                    |
| 6                   | When will data availability end?                                                                                                                   | -                                                                                                                                                                                                                                                                                    |
| 7                   | To whom will you share the data?                                                                                                                   | -                                                                                                                                                                                                                                                                                    |
| 8                   | For what type of analysis or purpose?                                                                                                              | -                                                                                                                                                                                                                                                                                    |
| 9                   | How or where can the data/documents be obtained?                                                                                                   | -                                                                                                                                                                                                                                                                                    |
| 10                  | Any other restrictions?                                                                                                                            | -                                                                                                                                                                                                                                                                                    |
